# Supplementary material
Source: MDPI journal article supplement (https://www.mdpi.com/2039-4713/13/3/30)
Supplement: s1 [file s1]

## Supplementary Materials

**Table S1** Results of the two-way ANOVA analysis performed on cell density, cell diameter and cell volume. Significant values ( $p < 0.05$ ) are in red.

|              | Source of variation | F value    | P value      |
|--------------|---------------------|------------|--------------|
| Cell density | Growth phase        | 3048,19672 | 1,80588E-123 |
|              | Treatment           | 12,18796   | 2,25824E-9   |
|              | Interaction         | 4,33003    | 7,31494E-10  |
| Diameter     | Growth phase        | 641,12607  | 2,59423E-87  |
|              | Treatment           | 1,16963    | 0,32887      |
|              | Interaction         | 1,66047    | 0,02074      |
| Volume       | Growth phase        | 518,05525  | 1,95787E-82  |
|              | Treatment           | 1,67877    | 0,14583      |
|              | Interaction         | 1,9279     | 0,00403      |

**Table S2** Results obtained from the post-hoc test performed on the cell density values. Each cell reports the P value of the corresponding treatment in comparison to the control of the same day. Significant values ( $p < 0.05$ ) are in red.

|       | MeOH    | BPAF    | BPF     | BPS     | MIX     |
|-------|---------|---------|---------|---------|---------|
| Day 1 | 0,47845 | 0,82192 | 0,60573 | 0,90718 | 0,1951  |
| Day 2 | 0,68017 | 0,83445 | 0,76475 | 0,68058 | 0,91911 |
| Day 3 | 0,79083 | 0,49471 | 0,41357 | 0,70505 | 0,99102 |
| Day 4 | 0,29864 | 0,14081 | 0,44063 | 0,34555 | 0,18337 |
| Day 5 | 0,1097  | 0,37191 | 0,16064 | 0,54006 | 0,4398  |
| Day 6 | 0,09556 | 0,1212  | 0,16566 | 0,19546 | 0,11987 |
| Day 7 | 0,8704  | <0.0001 | 0,67113 | 0,52899 | 0,63267 |
| Day 8 | 0,10757 | <0.0001 | 0,05465 | 0,30835 | 0,07261 |
| Day 9 | 0,09741 | <0.0001 | 0,29916 | <0.0001 | 0,06117 |

**Table S3** Growth rate ( $\mu$ ) calculated for each of the six treatments during the nine days of exposure

|            | Day 1    | Day 2    | Day 3    | Day 4    | Day 5    | Day 6    | Day 7    | Day 8    | Day 9    |
|------------|----------|----------|----------|----------|----------|----------|----------|----------|----------|
| $\mu$ C    | 0.076867 | 0.100163 | 0.111792 | 0.203694 | 0.2646   | 0.304557 | 0.293422 | 0.279867 | 0.269796 |
| $\mu$ MeOH | -0.09241 | 0.138639 | 0.09646  | 0.174749 | 0.24318  | 0.289551 | 0.292712 | 0.284876 | 0.273604 |
| $\mu$ BPAF | 0.125084 | 0.120033 | 0.070753 | 0.161496 | 0.252976 | 0.29435  | 0.27699  | 0.262935 | 0.249933 |
| $\mu$ BPF  | 0.184237 | 0.128379 | 0.061994 | 0.182571 | 0.245967 | 0.295467 | 0.291566 | 0.285841 | 0.267352 |
| $\mu$ BPS  | 0.050945 | 0.058536 | 0.089687 | 0.177583 | 0.256705 | 0.312615 | 0.296131 | 0.276601 | 0.259679 |
| $\mu$ MIX  | -0.25923 | 0.109916 | 0.112427 | 0.165938 | 0.254588 | 0.294312 | 0.295483 | 0.274022 | 0.265323 |

**Table S4** Growth rate of exponential phase ( $\mu$  EXP) and stationary phase ( $\mu$  STAT) calculated for each of the six treatments.

|            | C        | MeOH     | BPAF     | BPF      | BPS      | MIX      |
|------------|----------|----------|----------|----------|----------|----------|
| $\mu$ EXP  | 0.497322 | 0.482641 | 0.517947 | 0.528941 | 0.535544 | 0.476197 |
| $\mu$ STAT | 0.200273 | 0.24171  | 0.161099 | 0.21112  | 0.153808 | 0.207345 |

**Table S5** Results of the post-hoc test performed on the cell diameter values. Each cell reports the P value of the corresponding treatment in comparison to the control of the same day. Significant values ( $p < 0.05$ ) are in red.

|       | MeOH    | BPAF       | BPF     | BPS     | MIX     |
|-------|---------|------------|---------|---------|---------|
| Day 1 | 0,99017 | 0,32226    | 0,11819 | 0,86303 | 0,71168 |
| Day 2 | 0,97542 | 0,60926    | 0,83407 | 0,57945 | 0,69796 |
| Day 3 | 0,32828 | 0,62659    | 0,63096 | 0,32828 | 0,53407 |
| Day 4 | 0,68888 | 0,3531     | 0,49058 | 0,59214 | 0,79107 |
| Day 5 | 0,68888 | 0,69796    | 0,18298 | 0,79107 | 0,80057 |
| Day 6 | 0,10271 | 8,27387E-4 | 0,23108 | 0,15478 | 0,02108 |
| Day 7 | 0,24072 | 0,19528    | 0,48673 | 0,98034 | 0,19952 |
| Day 8 | 0,9068  | 0,22636    | 0,29608 | 0,9068  | 0,29326 |
| Day 9 | 0,46021 | 0,46395    | 0,98034 | 0,24318 | 0,22403 |

**Table S6** Results of the post-hoc test performed on the cell volume values. Each cell reports the P value of the corresponding treatment in comparison to the control of the same day. Significant values ( $p < 0.05$ ) are in red.

|       | MeOH    | BPAF       | BPF     | BPS     | MIX     |
|-------|---------|------------|---------|---------|---------|
| Day 1 | 1       | 0,33309    | 0,46746 | 0,80842 | 0,80842 |
| Day 2 | 1       | 0,80842    | 0,80842 | 0,62786 | 0,80842 |
| Day 3 | 0,46746 | 0,62786    | 0,62786 | 0,33309 | 0,62786 |
| Day 4 | 0,80842 | 0,33309    | 0,62786 | 0,62786 | 0,62786 |
| Day 5 | 0,62786 | 0,80842    | 0,22689 | 0,80842 | 0,80842 |
| Day 6 | 0,14763 | 1,74218E-4 | 0,14763 | 0,09173 | 0,01672 |
| Day 7 | 0,09173 | 0,09173    | 0,46746 | 1       | 0,05443 |
| Day 8 | 0,80842 | 0,09173    | 0,33309 | 1       | 0,46746 |
| Day 9 | 0,62786 | 0,62786    | 0,80842 | 0,14763 | 0,22689 |

**Table S7** Results of the two-way ANOVA analyses performed on the various biomarkers analyzed, namely the total antioxidant capacity (CUPRAC), superoxide dismutase (SOD), catalase (CAT), glutathione reductase (GR) and glutathione s-transferase (GST). Significant values ( $p < 0.05$ ) are in red.

| Biomarker | Source of variation | F value   | P value     |
|-----------|---------------------|-----------|-------------|
| CUPRAC    | Growth phase        | 99,66145  | 5,08098E-10 |
|           | Treatment           | 22,26397  | 2,68696E-8  |
|           | Interaction         | 7,02131   | 3,6038E-4   |
| SOD       | Growth phase        | 18,15843  | 2,71766E-4  |
|           | Treatment           | 9,96497   | 2,96035E-5  |
|           | Interaction         | 5,15396   | 0,00237     |
| CAT       | Growth phase        | 105,86848 | 2,80838E-10 |
|           | Treatment           | 4,07111   | 0,00811     |
|           | Interaction         | 3,84834   | 0,01058     |
| GR        | Growth phase        | 8,3984    | 0,0079      |
|           | Treatment           | 1,38849   | 0,26381     |
|           | Interaction         | 1,59831   | 0,19866     |
| GST       | Growth phase        | 0,13332   | 0,71821     |
|           | Treatment           | 15,64025  | 7,07074E-7  |
|           | Interaction         | 16,22454  | 5,09996E-7  |

**Table S8** Results of the two-way ANOVA analyses performed on the various biomarkers analyzed, namely glutathione peroxidase (GPX), ascorbate peroxidase (APX), protein carbonyl content (PCC), and lipid peroxidation (LPO). Significant values ( $p < 0.05$ ) are in red.

| Biomarker | Source of variation | F value  | P value   |
|-----------|---------------------|----------|-----------|
| GPX       | Growth phase        | 82,18097 | 3,2223E-9 |
|           | Treatment           | 3,14146  | 0,02543   |
|           | Interaction         | 2,49627  | 0,05896   |
| APX       | Growth phase        | 9,54206  | 0,00502   |
|           | Treatment           | 3,74008  | 0,01206   |
|           | Interaction         | 2,06356  | 0,1055    |
| PCC       | Growth phase        | 7,97379  | 0,00939   |
|           | Treatment           | 2,00518  | 0,11419   |
|           | Interaction         | 1,39022  | 0,2632    |
| LPO       | Growth phase        | 1,54145  | 0,2264    |
|           | Treatment           | 1,40571  | 0,25778   |
|           | Interaction         | 2,00846  | 0,11369   |

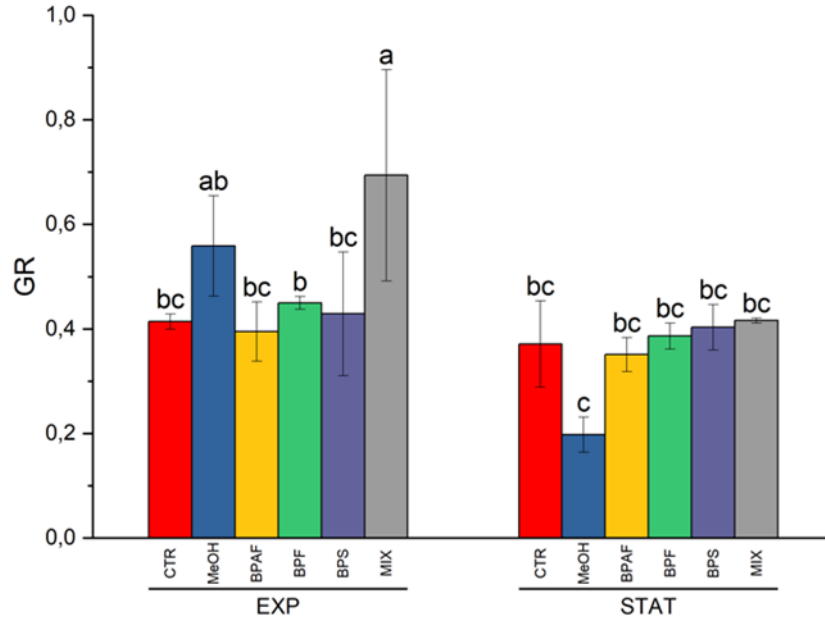

**Figure S1** glutathione reductase activity (GR), expressed as U/mg protein; the two growth phases are indicated as EXP and STAT. The values are mean  $\pm$  SD ( $n=3$ ). Different letters indicate statistically significant differences in comparison with the related control ( $p < 0.05$ ).

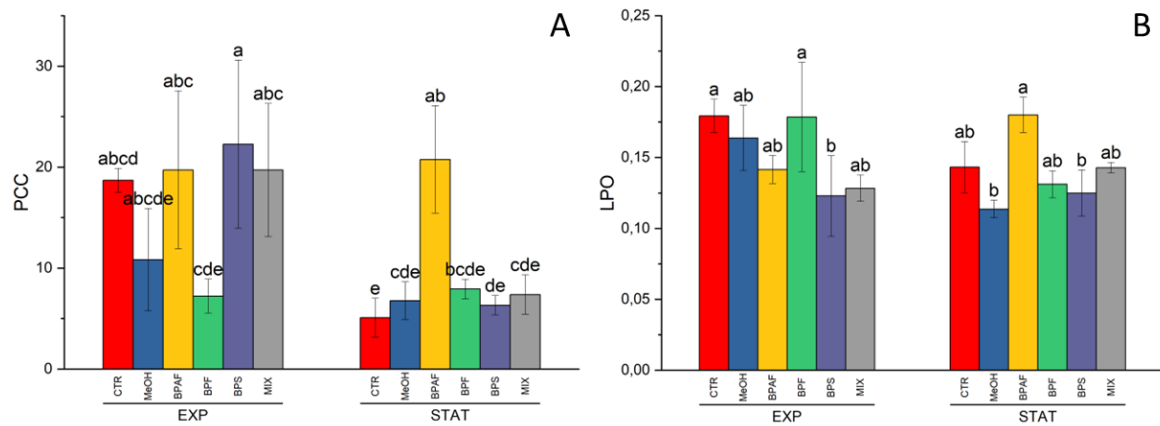

**Figure S2** protein carbonyl content (PCC), expressed as nmol/mg protein (A), and lipid peroxidation (LPO), expressed as nmol TBARS/mg protein (B); the two growth phases are indicated as EXP and STAT. The values are mean  $\pm$  SD ( $n=3$ ). Different letters indicate statistically significant differences in comparison with the related control ( $p < 0.05$ ).
